# Supplementary material
Source: publisher figshare collection journal article supplement (https://acs.figshare.com/ndownloader/files/4020490)
Supplement: Supplementary file 1 [file 4020490]

**Supporting information for:**

**On the Thermodynamics and Kinetics of**

**Hydrophobic Interactions at Interfaces**

Srivathsan Vembanur,<sup>†</sup> Amish J. Patel,<sup>‡</sup> Sapna Sarupria,<sup>¶</sup> and Shekhar Garde<sup>\*,†</sup>

*The Howard P. Isermann Department of Chemical and Biological Engineering and The  
Center for Biotechnology and Interdisciplinary Studies, Rensselaer Polytechnic Institute,  
Troy NY 12180,*

*Department of Chemical and Biomolecular Engineering, University of Pennsylvania,  
Philadelphia, PA 19104, and*

*Department of Chemical and Biomolecular Engineering, Clemson University, Clemson, SC  
29634*

E-mail: gardes@rpi.edu

---

\*To whom correspondence should be addressed

<sup>†</sup>Rensselaer Polytechnic Institute

<sup>‡</sup>University of Pennsylvania

<sup>¶</sup>Clemson University

# I. Kinetics: Rate Equations

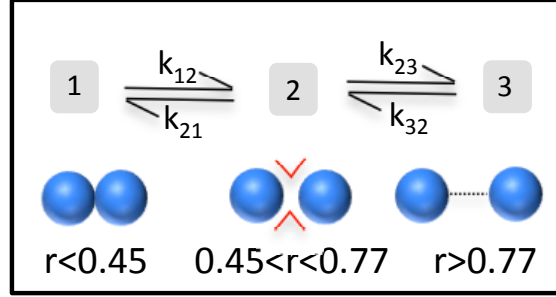

Figure S1: A schematic defining the three states for a pair of hydrophobic solutes: state **1**: contact; state **2**: solvent-separated; state **3**: dispersed.

The rate equations for the above process are as follows

$$\frac{d[1]}{dt} = k_{21}[2] - k_{12}[1] \quad (1)$$

$$\frac{d[2]}{dt} = k_{12}[1] + k_{32}[3] - [2](k_{21} + k_{23}) \quad (2)$$

$$\frac{d[3]}{dt} = k_{23}[2] - k_{32}[3] \quad (3)$$

where,  $k_{ij}$  is the rate constant for ‘i’ to ‘j’ transition and  $[i]$  is the concentration of the state ‘i’. At equilibrium,

$$\frac{k_{12}}{k_{21}} = \frac{\tau_{21}}{\tau_{12}} = \frac{[2]_{eq}}{[1]_{eq}} \quad (4)$$

$$\frac{k_{32}}{k_{23}} = \frac{\tau_{23}}{\tau_{32}} = \frac{[2]_{eq}}{[3]_{eq}} \quad (5)$$

$$k_{21} + k_{23} = \frac{k_{12}[1]_{eq} + k_{32}[3]_{eq}}{[2]_{eq}} \quad (6)$$

where  $[i]_{eq}$  is the equilibrium concentration of the state ‘**i**’ and  $\tau_{ij}$  is the mean first passage time for ‘**i**’ to ‘**j**’ transition, which is also equal to the inverse of  $k_{ij}$ .

We obtained equilibrium concentrations of states **1**, **2**, and **3** as well as the  $\tau_{ij}$  for all the relevant transitions (see Table S1). Table S2 shows that the equilibrium relations (Equations 4, 5, and 6) are indeed satisfied by our data, confirming that our trajectories are sufficiently long and that there are no non-ergodicity or sampling problems.

**Table S1: Equilibrium concentrations and mean first passage times (in picoseconds)**

| SAM                   | [1]   | [2]   | [3]   | $\tau_{12} = \frac{1}{k_{12}}$ | $\tau_{21} = \frac{1}{k_{21}}$ | $\tau_{23} = \frac{1}{k_{23}}$ | $\tau_{32} = \frac{1}{k_{32}}$ |
|-----------------------|-------|-------|-------|--------------------------------|--------------------------------|--------------------------------|--------------------------------|
| near -OH              | 0.043 | 0.104 | 0.853 | 5.89                           | 14.30                          | 7.18                           | 58.35                          |
| near -CH <sub>3</sub> | 0.078 | 0.108 | 0.813 | 2.64                           | 3.65                           | 3.48                           | 26.12                          |

**Table S2: Validating equilibrium**

| SAM                   | $\frac{k_{12}}{k_{21}} = \frac{\tau_{21}}{\tau_{12}}$ | $\frac{[2]_{eq}}{[1]_{eq}}$ | $\frac{k_{32}}{k_{23}} = \frac{\tau_{23}}{\tau_{32}}$ | $\frac{[2]_{eq}}{[3]_{eq}}$ | $k_{21} + k_{23}$ | $\frac{k_{12}[1]_{eq} + k_{32}[3]_{eq}}{[2]_{eq}}$ |
|-----------------------|-------------------------------------------------------|-----------------------------|-------------------------------------------------------|-----------------------------|-------------------|----------------------------------------------------|
| near -OH              | 2.42                                                  | 2.42                        | 0.12                                                  | 0.12                        | 0.21              | 0.21                                               |
| near -CH <sub>3</sub> | 1.38                                                  | 1.38                        | 0.13                                                  | 0.13                        | 0.56              | 0.56                                               |

## II. Including the Jacobian of transformation in the PMFs

To account for the Jacobian of transformation (i.e., the relative volume of the states), we plot,  $W_2^J(r) = W(r) - kT \ln(r)$ , in Figure S2. The PMFs are arbitrarily zeroed at the contact-minimum (CM). Inclusion of the Jacobian term shows that the barrier heights for **2**→**1** and **1**→**2** transitions are approximately equal near the -OH surface. This fact and that state **2** can transition to either state **1** or state **3** qualitatively accounts for the relative differences in  $\tau_{12}$  and  $\tau_{21}$  near the -OH surface. Similar factors are in play for transitions near the -CH<sub>3</sub> surface.

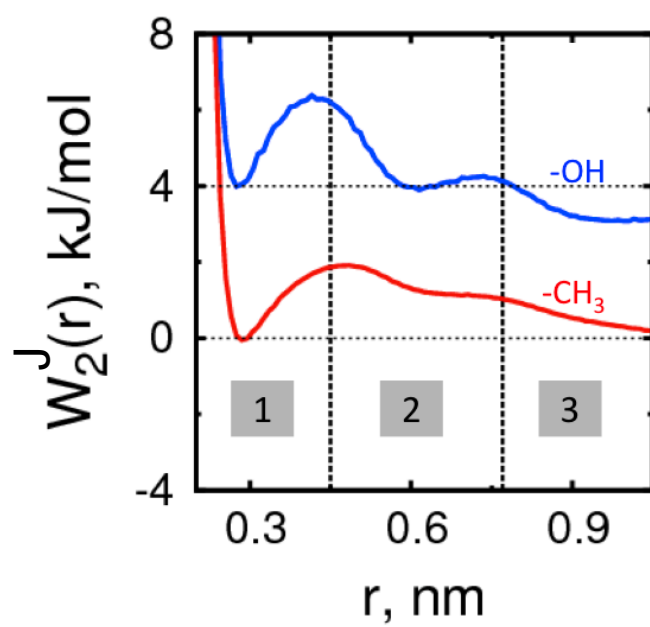

Figure S2: PMF between the solutes with Jacobian of transformation included. (red = near  $-\text{CH}_3$ ; blue = near  $-\text{OH}$ )
